# Supplementary material
Source: MDPI journal article supplement (https://www.mdpi.com/2304-6740/2/3/508)
Supplement: s1 [file s1]

  
data_2 
  
_audit_creation_method            SHELXL-97 
_chemical_name_systematic 
; 
 ? 
; 
_chemical_name_common             ? 
_chemical_melting_point           ? 
_chemical_formula_moiety          ? 
_chemical_formula_sum 
 'C37 H22 Cl4 F6 N6 Pt2 S2' 
_chemical_formula_weight          1260.71 
  
loop_ 
 _atom_type_symbol 
 _atom_type_description 
 _atom_type_scat_dispersion_real 
 _atom_type_scat_dispersion_imag 
 _atom_type_scat_source 
 'C'  'C'   0.0033   0.0016 
 'International Tables Vol C Tables 4.2.6.8 and 6.1.1.4' 
 'H'  'H'   0.0000   0.0000 
 'International Tables Vol C Tables 4.2.6.8 and 6.1.1.4' 
 'N'  'N'   0.0061   0.0033 
 'International Tables Vol C Tables 4.2.6.8 and 6.1.1.4' 
 'F'  'F'   0.0171   0.0103 
 'International Tables Vol C Tables 4.2.6.8 and 6.1.1.4' 
 'S'  'S'   0.1246   0.1234 
 'International Tables Vol C Tables 4.2.6.8 and 6.1.1.4' 
 'Cl'  'Cl'   0.1484   0.1585 
 'International Tables Vol C Tables 4.2.6.8 and 6.1.1.4' 
 'Pt'  'Pt'  -1.7033   8.3905 
 'International Tables Vol C Tables 4.2.6.8 and 6.1.1.4' 
  
_symmetry_cell_setting            triclinic 
_symmetry_space_group_name_H-M    'P -1' 
  
loop_ 
 _symmetry_equiv_pos_as_xyz 
 'x, y, z' 
 '-x, -y, -z' 
  
_cell_length_a                    11.3613(3) 
_cell_length_b                    11.8938(3) 
_cell_length_c                    14.2579(3) 
_cell_angle_alpha                 90.003(2) 
_cell_angle_beta                  98.289(2) 
_cell_angle_gamma                 101.170(2) 
_cell_volume                      1869.64(8) 
_cell_formula_units_Z             2 
_cell_measurement_temperature     100(2) 
_cell_measurement_reflns_used     17049 
_cell_measurement_theta_min       4.1991 
_cell_measurement_theta_max       28.8197 
  
_exptl_crystal_description        prismatic 
_exptl_crystal_colour             brown
_exptl_crystal_size_max           0.44 
_exptl_crystal_size_mid           0.12 
_exptl_crystal_size_min           0.11 
_exptl_crystal_density_meas       ? 
_exptl_crystal_density_diffrn     2.239 
_exptl_crystal_density_method     'not measured' 
_exptl_crystal_F_000              1192 
_exptl_absorpt_coefficient_mu     7.942 
_exptl_absorpt_correction_type    multi-scan 
_exptl_absorpt_correction_T_min   0.1279 
_exptl_absorpt_correction_T_max   0.4754 
_exptl_absorpt_process_details
;
CrysAlisPro, Agilent Technologies,
Version 1.171.35.21 (release 20-01-2012 CrysAlis171 .NET)
(compiled Jan 23 2012,18:06:46)
Empirical absorption correction using spherical harmonics,
 implemented in SCALE3 ABSPACK scaling algorithm.
;
  
_diffrn_ambient_temperature       100(2) 
_diffrn_radiation_wavelength      0.71073 
_diffrn_radiation_type            MoK\a 
_diffrn_radiation_source          'fine-focus sealed tube' 
_diffrn_radiation_monochromator   graphite 
_diffrn_measurement_device_type   'Xcalibur, Sapphire3' 
_diffrn_measurement_method        '\w scans' 
_diffrn_detector_area_resol_mean  16.0655 
_diffrn_standards_number          ? 
_diffrn_standards_interval_count  ? 
_diffrn_standards_interval_time   ? 
_diffrn_standards_decay_%         ? 
_diffrn_reflns_number             41040 
_diffrn_reflns_av_R_equivalents   0.0302 
_diffrn_reflns_av_sigmaI/netI     0.0257 
_diffrn_reflns_limit_h_min        -15 
_diffrn_reflns_limit_h_max        15 
_diffrn_reflns_limit_k_min        -16 
_diffrn_reflns_limit_k_max        15 
_diffrn_reflns_limit_l_min        -19 
_diffrn_reflns_limit_l_max        18 
_diffrn_reflns_theta_min          4.21 
_diffrn_reflns_theta_max          28.88 
_diffrn_orient_matrix_UB_11       0.0274136000
_diffrn_orient_matrix_UB_12       0.0016248000
_diffrn_orient_matrix_UB_13      -0.0417644000
_diffrn_orient_matrix_UB_21      -0.0452505000
_diffrn_orient_matrix_UB_22      -0.0470669000
_diffrn_orient_matrix_UB_23      -0.0196473000
_diffrn_orient_matrix_UB_31      -0.0366054000
_diffrn_orient_matrix_UB_32       0.0384743000
_diffrn_orient_matrix_UB_33      -0.0199801000
_diffrn_measurement_details
;
#__ type_ start__ end____ width___ exp.time_
  1 omega  -11.00   20.00   1.0000   11.0000
omega____ theta____ kappa____ phi______ frames
    -      -19.9615  -99.0000   30.0000 31

#__ type_ start__ end____ width___ exp.time_
  2 omega  -25.00   14.00   1.0000   11.0000
omega____ theta____ kappa____ phi______ frames
    -      -19.9615  -99.0000 -180.0000 39

#__ type_ start__ end____ width___ exp.time_
  3 omega  -48.00   46.00   1.0000   11.0000
omega____ theta____ kappa____ phi______ frames
    -       22.1490  -57.0000 -120.0000 94

#__ type_ start__ end____ width___ exp.time_
  4 omega   -1.00   90.00   1.0000   11.0000
omega____ theta____ kappa____ phi______ frames
    -       22.1490   57.0000   30.0000 91

#__ type_ start__ end____ width___ exp.time_
  5 omega  -22.00   40.00   1.0000   11.0000
omega____ theta____ kappa____ phi______ frames
    -       22.1490  -99.0000  120.0000 62

#__ type_ start__ end____ width___ exp.time_
  6 omega  -46.00   42.00   1.0000   11.0000
omega____ theta____ kappa____ phi______ frames
    -       22.1490  -37.0000  120.0000 88

#__ type_ start__ end____ width___ exp.time_
  7 omega  -91.00    4.00   1.0000   11.0000
omega____ theta____ kappa____ phi______ frames
    -      -19.9615  -57.0000   60.0000 95

#__ type_ start__ end____ width___ exp.time_
  8 omega  -33.00   20.00   1.0000   11.0000
omega____ theta____ kappa____ phi______ frames
    -      -19.9615  -91.0000  -82.0000 53

#__ type_ start__ end____ width___ exp.time_
  9 omega   32.00  104.00   1.0000   11.0000
omega____ theta____ kappa____ phi______ frames
    -       22.1490 -179.0000  120.0000 72

#__ type_ start__ end____ width___ exp.time_
 10 omega   32.00  104.00   1.0000   11.0000
omega____ theta____ kappa____ phi______ frames
    -       22.1490 -179.0000  -90.0000 72

#__ type_ start__ end____ width___ exp.time_
 11 omega  -44.00   98.00   1.0000   11.0000
omega____ theta____ kappa____ phi______ frames
    -       22.1490   19.0000  -90.0000 142

#__ type_ start__ end____ width___ exp.time_
 12 omega  -25.00   67.00   1.0000   11.0000
omega____ theta____ kappa____ phi______ frames
    -       22.1490  -99.0000  -60.0000 92

#__ type_ start__ end____ width___ exp.time_
 13 omega  -25.00   67.00   1.0000   11.0000
omega____ theta____ kappa____ phi______ frames
    -       22.1490  -99.0000 -180.0000 92

#__ type_ start__ end____ width___ exp.time_
 14 omega  -17.00   23.00   1.0000   11.0000
omega____ theta____ kappa____ phi______ frames
    -       22.1490   91.0000 -148.0000 40

#__ type_ start__ end____ width___ exp.time_
 15 omega  -10.00   96.00   1.0000   11.0000
omega____ theta____ kappa____ phi______ frames
    -       22.1490   37.0000    0.0000 106

;
_reflns_number_total              8961 
_reflns_number_gt                 8119 
_reflns_threshold_expression      >2sigma(I) 
  
_computing_data_collection
;
CrysAlisPro, Agilent Technologies,
Version 1.171.35.21 (release 20-01-2012 CrysAlis171 .NET)
(compiled Jan 23 2012,18:06:46)
;
_computing_cell_refinement
;
CrysAlisPro, Agilent Technologies,
Version 1.171.35.21 (release 20-01-2012 CrysAlis171 .NET)
(compiled Jan 23 2012,18:06:46)
;
_computing_data_reduction
;
CrysAlisPro, Agilent Technologies,
Version 1.171.35.21 (release 20-01-2012 CrysAlis171 .NET)
(compiled Jan 23 2012,18:06:46)
;
_computing_structure_solution     'SHELXS-97 (Sheldrick, 1990)' 
_computing_structure_refinement   'SHELXL-97 (Sheldrick, 1997)' 
_computing_molecular_graphics     ? 
_computing_publication_material   ? 
  
_refine_special_details 
; 
 Refinement of F^2^ against ALL reflections.  The weighted R-factor wR and 
 goodness of fit S are based on F^2^, conventional R-factors R are based 
 on F, with F set to zero for negative F^2^. The threshold expression of 
 F^2^ > 2sigma(F^2^) is used only for calculating R-factors(gt) etc. and is 
 not relevant to the choice of reflections for refinement.  R-factors based 
 on F^2^ are statistically about twice as large as those based on F, and R- 
 factors based on ALL data will be even larger. 
; 
  
_refine_ls_structure_factor_coef  Fsqd 
_refine_ls_matrix_type            full 
_refine_ls_weighting_scheme       calc 
_refine_ls_weighting_details 
 'calc w=1/[\s^2^(Fo^2^)+(0.0203P)^2^+2.1347P] where P=(Fo^2^+2Fc^2^)/3' 
_atom_sites_solution_primary      direct 
_atom_sites_solution_secondary    difmap 
_atom_sites_solution_hydrogens    geom 
_refine_ls_hydrogen_treatment     constr
_refine_ls_extinction_method      none 
_refine_ls_extinction_coef        ? 
_refine_ls_number_reflns          8961 
_refine_ls_number_parameters      514 
_refine_ls_number_restraints      0 
_refine_ls_R_factor_all           0.0250 
_refine_ls_R_factor_gt            0.0207 
_refine_ls_wR_factor_ref          0.0465 
_refine_ls_wR_factor_gt           0.0446 
_refine_ls_goodness_of_fit_ref    1.024 
_refine_ls_restrained_S_all       1.024 
_refine_ls_shift/su_max           0.002 
_refine_ls_shift/su_mean          0.000 
  
loop_ 
 _atom_site_label 
 _atom_site_type_symbol 
 _atom_site_fract_x 
 _atom_site_fract_y 
 _atom_site_fract_z 
 _atom_site_U_iso_or_equiv 
 _atom_site_adp_type 
 _atom_site_occupancy 
 _atom_site_symmetry_multiplicity 
 _atom_site_calc_flag 
 _atom_site_refinement_flags 
 _atom_site_disorder_assembly 
 _atom_site_disorder_group 
Pt1 Pt 0.284083(9) 0.876682(9) 0.249991(7) 0.00964(3) Uani 1 1 d . . . 
Pt2 Pt 0.114821(9) 0.979665(9) 0.292802(7) 0.00900(3) Uani 1 1 d . . . 
Cl1 Cl 0.43850(6) 0.76807(7) 0.22644(5) 0.01725(15) Uani 1 1 d . . . 
Cl2 Cl -0.05504(6) 1.06166(6) 0.32840(5) 0.01620(14) Uani 1 1 d . . . 
S1 S -0.01697(6) 0.86743(6) 0.17593(5) 0.01200(14) Uani 1 1 d . . . 
S2 S 0.30808(6) 0.82075(6) 0.40499(5) 0.01314(14) Uani 1 1 d . . . 
N1 N 0.2771(2) 0.9246(2) 0.10854(17) 0.0116(5) Uani 1 1 d . . . 
N2 N 0.2267(2) 1.0891(2) 0.39665(17) 0.0116(5) Uani 1 1 d . . . 
N3 N 0.1426(2) 0.7275(2) 0.21742(17) 0.0115(5) Uani 1 1 d . . . 
N4 N -0.0544(2) 0.6473(2) 0.13828(17) 0.0133(5) Uani 1 1 d . . . 
N5 N 0.0750(2) 0.8429(2) 0.38901(16) 0.0104(5) Uani 1 1 d . . . 
N6 N 0.1465(2) 0.7214(2) 0.50728(17) 0.0137(5) Uani 1 1 d . . . 
F1 F -0.20475(18) 0.41428(19) 0.14421(14) 0.0334(5) Uani 1 1 d . . . 
F2 F -0.1676(2) 0.47620(18) 0.00949(14) 0.0364(5) Uani 1 1 d . . . 
F3 F -0.0680(2) 0.35728(19) 0.0801(2) 0.0496(7) Uani 1 1 d . . . 
F4 F 0.0595(2) 0.52015(18) 0.59959(15) 0.0378(5) Uani 1 1 d . . . 
F5 F 0.0781(2) 0.66447(18) 0.69095(14) 0.0370(5) Uani 1 1 d . . . 
F6 F -0.09667(19) 0.5850(2) 0.62073(18) 0.0569(8) Uani 1 1 d . . . 
C1 C 0.4181(2) 1.0167(2) 0.2675(2) 0.0120(6) Uani 1 1 d . . . 
C2 C 0.4934(3) 1.0627(3) 0.3485(2) 0.0157(6) Uani 1 1 d . . . 
H2 H 0.4842 1.0285 0.4079 0.019 Uiso 1 1 calc R . . 
C3 C 0.5840(3) 1.1605(3) 0.3429(2) 0.0191(6) Uani 1 1 d . . . 
H3 H 0.6347 1.1918 0.3994 0.023 Uiso 1 1 calc R . . 
C4 C 0.6016(3) 1.2123(3) 0.2586(2) 0.0184(6) Uani 1 1 d . . . 
H4 H 0.6637 1.2781 0.2571 0.022 Uiso 1 1 calc R . . 
C5 C 0.5263(3) 1.1666(3) 0.1740(2) 0.0139(6) Uani 1 1 d . . . 
C6 C 0.5394(3) 1.2134(3) 0.0823(2) 0.0177(6) Uani 1 1 d . . . 
H6 H 0.5993 1.2800 0.0773 0.021 Uiso 1 1 calc R . . 
C7 C 0.4683(3) 1.1645(3) 0.0030(2) 0.0161(6) Uani 1 1 d . . . 
H7 H 0.4798 1.1971 -0.0566 0.019 Uiso 1 1 calc R . . 
C8 C 0.3758(3) 1.0646(3) 0.0069(2) 0.0130(6) Uani 1 1 d . . . 
C9 C 0.2977(3) 1.0098(3) -0.0718(2) 0.0158(6) Uani 1 1 d . . . 
H9 H 0.3035 1.0384 -0.1335 0.019 Uiso 1 1 calc R . . 
C10 C 0.2128(3) 0.9144(3) -0.0588(2) 0.0160(6) Uani 1 1 d . . . 
H10 H 0.1595 0.8763 -0.1117 0.019 Uiso 1 1 calc R . . 
C11 C 0.2047(3) 0.8735(3) 0.0322(2) 0.0141(6) Uani 1 1 d . . . 
H11 H 0.1458 0.8070 0.0400 0.017 Uiso 1 1 calc R . . 
C12 C 0.3627(2) 1.0189(2) 0.0966(2) 0.0107(5) Uani 1 1 d . . . 
C13 C 0.4375(2) 1.0682(3) 0.1804(2) 0.0123(6) Uani 1 1 d . . . 
C14 C 0.1616(2) 1.1145(2) 0.2110(2) 0.0117(6) Uani 1 1 d . . . 
C15 C 0.1282(3) 1.1291(3) 0.1157(2) 0.0149(6) Uani 1 1 d . . . 
H15 H 0.0725 1.0703 0.0785 0.018 Uiso 1 1 calc R . . 
C16 C 0.1766(3) 1.2311(3) 0.0736(2) 0.0170(6) Uani 1 1 d . . . 
H16 H 0.1533 1.2395 0.0077 0.020 Uiso 1 1 calc R . . 
C17 C 0.2566(3) 1.3191(3) 0.1243(2) 0.0190(6) Uani 1 1 d . . . 
H17 H 0.2886 1.3865 0.0935 0.023 Uiso 1 1 calc R . . 
C18 C 0.2908(3) 1.3088(3) 0.2222(2) 0.0166(6) Uani 1 1 d . . . 
C19 C 0.3720(3) 1.3965(3) 0.2822(2) 0.0199(7) Uani 1 1 d . . . 
H19 H 0.4048 1.4665 0.2552 0.024 Uiso 1 1 calc R . . 
C20 C 0.4030(3) 1.3819(3) 0.3757(2) 0.0208(7) Uani 1 1 d . . . 
H20 H 0.4567 1.4419 0.4130 0.025 Uiso 1 1 calc R . . 
C21 C 0.3560(3) 1.2771(3) 0.4199(2) 0.0162(6) Uani 1 1 d . . . 
C22 C 0.3869(3) 1.2533(3) 0.5156(2) 0.0193(7) Uani 1 1 d . . . 
H22 H 0.4430 1.3079 0.5566 0.023 Uiso 1 1 calc R . . 
C23 C 0.3348(3) 1.1497(3) 0.5496(2) 0.0172(6) Uani 1 1 d . . . 
H23 H 0.3542 1.1331 0.6145 0.021 Uiso 1 1 calc R . . 
C24 C 0.2538(3) 1.0694(3) 0.4887(2) 0.0152(6) Uani 1 1 d . . . 
H24 H 0.2171 0.9990 0.5132 0.018 Uiso 1 1 calc R . . 
C25 C 0.2754(2) 1.1918(2) 0.3624(2) 0.0127(6) Uani 1 1 d . . . 
C26 C 0.2417(3) 1.2062(3) 0.2638(2) 0.0131(6) Uani 1 1 d . . . 
C27 C 0.0279(2) 0.7361(2) 0.1782(2) 0.0121(6) Uani 1 1 d . . . 
C28 C 0.1689(3) 0.6221(3) 0.2246(2) 0.0147(6) Uani 1 1 d . . . 
H28 H 0.2463 0.6137 0.2558 0.018 Uiso 1 1 calc R . . 
C29 C 0.0871(3) 0.5264(3) 0.1881(2) 0.0163(6) Uani 1 1 d . . . 
H29 H 0.1048 0.4516 0.1939 0.020 Uiso 1 1 calc R . . 
C30 C -0.0225(3) 0.5456(3) 0.1423(2) 0.0144(6) Uani 1 1 d . . . 
C31 C -0.1167(3) 0.4479(3) 0.0935(2) 0.0180(6) Uani 1 1 d . . . 
C32 C 0.1631(2) 0.7925(2) 0.4355(2) 0.0116(6) Uani 1 1 d . . . 
C33 C -0.0382(3) 0.8093(3) 0.4095(2) 0.0132(6) Uani 1 1 d . . . 
H33 H -0.1023 0.8396 0.3748 0.016 Uiso 1 1 calc R . . 
C34 C -0.0637(3) 0.7324(3) 0.4790(2) 0.0142(6) Uani 1 1 d . . . 
H34 H -0.1439 0.7072 0.4927 0.017 Uiso 1 1 calc R . . 
C35 C 0.0340(3) 0.6939(2) 0.5278(2) 0.0140(6) Uani 1 1 d . . . 
C36 C 0.0191(3) 0.6163(3) 0.6105(2) 0.0203(7) Uani 1 1 d . . . 
Cl3 Cl 0.70413(10) 0.58202(11) 0.29530(8) 0.0501(3) Uani 1 1 d . . . 
Cl4 Cl 0.56671(9) 0.55064(9) 0.10504(7) 0.0357(2) Uani 1 1 d . . . 
C37 C 0.6702(3) 0.6460(3) 0.1856(3) 0.0351(9) Uani 1 1 d . . . 
H37A H 0.6356 0.7145 0.1961 0.042 Uiso 1 1 calc R . . 
H37B H 0.7459 0.6716 0.1583 0.042 Uiso 1 1 calc R . . 
  
loop_ 
 _atom_site_aniso_label 
 _atom_site_aniso_U_11 
 _atom_site_aniso_U_22 
 _atom_site_aniso_U_33 
 _atom_site_aniso_U_23 
 _atom_site_aniso_U_13 
 _atom_site_aniso_U_12 
Pt1 0.00892(5) 0.01129(6) 0.00874(6) 0.00065(4) 0.00132(4) 0.00204(4) 
Pt2 0.00908(5) 0.00952(6) 0.00838(6) -0.00007(4) 0.00110(4) 0.00191(4) 
Cl1 0.0155(3) 0.0213(4) 0.0179(4) 0.0016(3) 0.0051(3) 0.0089(3) 
Cl2 0.0140(3) 0.0171(4) 0.0191(4) -0.0005(3) 0.0038(3) 0.0063(3) 
S1 0.0122(3) 0.0106(3) 0.0126(3) -0.0009(3) -0.0007(3) 0.0028(3) 
S2 0.0105(3) 0.0190(4) 0.0104(3) 0.0034(3) 0.0019(3) 0.0039(3) 
N1 0.0115(11) 0.0127(12) 0.0107(12) 0.0001(9) 0.0018(9) 0.0026(9) 
N2 0.0120(11) 0.0120(12) 0.0106(12) -0.0018(9) 0.0015(9) 0.0022(9) 
N3 0.0119(11) 0.0116(12) 0.0110(12) 0.0007(9) 0.0038(9) 0.0009(9) 
N4 0.0156(12) 0.0133(13) 0.0111(12) -0.0008(10) 0.0048(9) 0.0006(10) 
N5 0.0114(11) 0.0099(12) 0.0095(12) -0.0005(9) 0.0014(9) 0.0014(9) 
N6 0.0149(12) 0.0125(13) 0.0133(12) 0.0016(10) 0.0017(9) 0.0017(10) 
F1 0.0254(10) 0.0376(13) 0.0283(11) -0.0002(9) 0.0069(8) -0.0176(9) 
F2 0.0519(14) 0.0283(12) 0.0173(10) 0.0005(9) -0.0084(9) -0.0107(10) 
F3 0.0323(12) 0.0237(12) 0.089(2) -0.0309(13) -0.0060(12) 0.0082(10) 
F4 0.0674(16) 0.0195(11) 0.0295(12) 0.0096(9) 0.0101(11) 0.0138(11) 
F5 0.0639(15) 0.0271(12) 0.0146(10) 0.0049(9) -0.0001(10) 0.0002(11) 
F6 0.0207(11) 0.091(2) 0.0596(17) 0.0591(16) 0.0129(11) 0.0061(12) 
C1 0.0082(12) 0.0118(14) 0.0154(14) -0.0018(11) 0.0028(11) 0.0000(10) 
C2 0.0151(14) 0.0193(16) 0.0120(14) -0.0007(12) 0.0021(11) 0.0017(12) 
C3 0.0133(14) 0.0254(18) 0.0153(15) -0.0025(13) -0.0009(11) -0.0021(12) 
C4 0.0150(14) 0.0211(17) 0.0170(16) -0.0021(13) 0.0026(12) -0.0015(12) 
C5 0.0187(14) 0.0133(15) 0.0107(14) 0.0009(11) 0.0065(11) 0.0023(12) 
C6 0.0135(14) 0.0178(16) 0.0225(17) 0.0032(13) 0.0071(12) 0.0016(12) 
C7 0.0188(15) 0.0168(16) 0.0141(15) 0.0050(12) 0.0063(12) 0.0041(12) 
C8 0.0136(13) 0.0135(15) 0.0134(14) 0.0012(11) 0.0033(11) 0.0056(11) 
C9 0.0196(15) 0.0198(16) 0.0105(14) 0.0023(12) 0.0051(11) 0.0079(12) 
C10 0.0180(15) 0.0185(16) 0.0113(14) -0.0034(12) 0.0002(11) 0.0043(12) 
C11 0.0126(13) 0.0147(15) 0.0143(15) -0.0019(12) 0.0003(11) 0.0021(11) 
C12 0.0120(13) 0.0112(14) 0.0105(14) 0.0033(11) 0.0045(10) 0.0042(11) 
C13 0.0102(13) 0.0149(15) 0.0116(14) 0.0005(11) 0.0021(10) 0.0020(11) 
C14 0.0107(13) 0.0115(14) 0.0139(14) 0.0027(11) 0.0054(11) 0.0023(11) 
C15 0.0142(14) 0.0166(16) 0.0147(15) -0.0002(12) 0.0022(11) 0.0051(12) 
C16 0.0218(15) 0.0177(16) 0.0143(15) 0.0060(12) 0.0064(12) 0.0077(12) 
C17 0.0204(15) 0.0139(16) 0.0247(17) 0.0042(13) 0.0095(13) 0.0038(12) 
C18 0.0150(14) 0.0129(15) 0.0217(16) 0.0010(12) 0.0042(12) 0.0012(11) 
C19 0.0189(15) 0.0128(16) 0.0284(18) 0.0001(13) 0.0079(13) 0.0007(12) 
C20 0.0164(15) 0.0142(16) 0.0292(18) -0.0059(13) 0.0026(13) -0.0023(12) 
C21 0.0137(14) 0.0159(16) 0.0181(15) -0.0044(12) 0.0010(11) 0.0018(12) 
C22 0.0143(14) 0.0237(17) 0.0195(16) -0.0087(13) 0.0008(12) 0.0038(12) 
C23 0.0171(15) 0.0236(17) 0.0113(14) -0.0033(12) -0.0006(11) 0.0068(13) 
C24 0.0174(14) 0.0166(16) 0.0127(15) 0.0001(12) 0.0025(11) 0.0058(12) 
C25 0.0100(13) 0.0120(14) 0.0156(15) -0.0027(11) 0.0020(11) 0.0008(11) 
C26 0.0125(13) 0.0132(15) 0.0156(15) 0.0004(11) 0.0044(11) 0.0058(11) 
C27 0.0127(13) 0.0127(14) 0.0108(14) 0.0026(11) 0.0043(11) 0.0004(11) 
C28 0.0170(14) 0.0156(15) 0.0128(14) 0.0012(12) 0.0043(11) 0.0045(12) 
C29 0.0221(15) 0.0108(15) 0.0181(16) 0.0025(12) 0.0065(12) 0.0053(12) 
C30 0.0179(14) 0.0138(15) 0.0116(14) -0.0014(11) 0.0074(11) -0.0005(12) 
C31 0.0202(15) 0.0137(15) 0.0194(16) -0.0033(12) 0.0049(12) -0.0001(12) 
C32 0.0129(13) 0.0108(14) 0.0104(14) -0.0008(11) 0.0003(10) 0.0017(11) 
C33 0.0128(13) 0.0164(15) 0.0106(14) -0.0052(11) 0.0002(11) 0.0039(11) 
C34 0.0134(14) 0.0146(15) 0.0144(15) -0.0005(12) 0.0042(11) 0.0005(11) 
C35 0.0157(14) 0.0112(15) 0.0145(15) -0.0018(11) 0.0032(11) 0.0006(11) 
C36 0.0174(15) 0.0231(18) 0.0196(16) 0.0066(13) 0.0030(12) 0.0020(13) 
Cl3 0.0513(6) 0.0618(8) 0.0363(6) -0.0188(5) -0.0081(5) 0.0194(6) 
Cl4 0.0377(5) 0.0378(6) 0.0316(5) -0.0010(4) 0.0037(4) 0.0088(4) 
C37 0.0211(17) 0.029(2) 0.057(3) -0.0034(18) 0.0084(17) 0.0072(15) 
  
_geom_special_details 
; 
 All esds (except the esd in the dihedral angle between two l.s. planes) 
 are estimated using the full covariance matrix.  The cell esds are taken 
 into account individually in the estimation of esds in distances, angles 
 and torsion angles; correlations between esds in cell parameters are only 
 used when they are defined by crystal symmetry.  An approximate (isotropic) 
 treatment of cell esds is used for estimating esds involving l.s. planes. 
; 
  
loop_ 
 _geom_bond_atom_site_label_1 
 _geom_bond_atom_site_label_2 
 _geom_bond_distance 
 _geom_bond_site_symmetry_2 
 _geom_bond_publ_flag 
Pt1 C1 2.015(3) . ? 
Pt1 N1 2.090(2) . ? 
Pt1 N3 2.151(2) . ? 
Pt1 S2 2.3016(7) . ? 
Pt1 Cl1 2.4305(7) . ? 
Pt1 Pt2 2.61188(15) . ? 
Pt2 C14 2.015(3) . ? 
Pt2 N2 2.078(2) . ? 
Pt2 N5 2.151(2) . ? 
Pt2 S1 2.3036(7) . ? 
Pt2 Cl2 2.4381(7) . ? 
S1 C27 1.733(3) . ? 
S2 C32 1.734(3) . ? 
N1 C11 1.334(4) . ? 
N1 C12 1.364(4) . ? 
N2 C24 1.335(4) . ? 
N2 C25 1.361(4) . ? 
N3 C28 1.344(4) . ? 
N3 C27 1.365(4) . ? 
N4 C30 1.326(4) . ? 
N4 C27 1.333(4) . ? 
N5 C33 1.344(4) . ? 
N5 C32 1.358(3) . ? 
N6 C35 1.331(4) . ? 
N6 C32 1.339(4) . ? 
F1 C31 1.318(3) . ? 
F2 C31 1.325(4) . ? 
F3 C31 1.328(4) . ? 
F4 C36 1.329(4) . ? 
F5 C36 1.313(4) . ? 
F6 C36 1.325(4) . ? 
C1 C2 1.379(4) . ? 
C1 C13 1.412(4) . ? 
C2 C3 1.406(4) . ? 
C3 C4 1.374(4) . ? 
C4 C5 1.416(4) . ? 
C5 C13 1.402(4) . ? 
C5 C6 1.437(4) . ? 
C6 C7 1.349(4) . ? 
C7 C8 1.433(4) . ? 
C8 C9 1.400(4) . ? 
C8 C12 1.405(4) . ? 
C9 C10 1.371(4) . ? 
C10 C11 1.395(4) . ? 
C12 C13 1.417(4) . ? 
C14 C15 1.377(4) . ? 
C14 C26 1.416(4) . ? 
C15 C16 1.404(4) . ? 
C16 C17 1.373(5) . ? 
C17 C18 1.405(4) . ? 
C18 C26 1.409(4) . ? 
C18 C19 1.438(4) . ? 
C19 C20 1.349(5) . ? 
C20 C21 1.440(4) . ? 
C21 C25 1.402(4) . ? 
C21 C22 1.402(4) . ? 
C22 C23 1.380(5) . ? 
C23 C24 1.394(4) . ? 
C25 C26 1.422(4) . ? 
C28 C29 1.372(4) . ? 
C29 C30 1.380(4) . ? 
C30 C31 1.512(4) . ? 
C33 C34 1.373(4) . ? 
C34 C35 1.378(4) . ? 
C35 C36 1.506(4) . ? 
Cl3 C37 1.764(4) . ? 
Cl4 C37 1.756(4) . ? 
  
loop_ 
 _geom_angle_atom_site_label_1 
 _geom_angle_atom_site_label_2 
 _geom_angle_atom_site_label_3 
 _geom_angle 
 _geom_angle_site_symmetry_1 
 _geom_angle_site_symmetry_3 
 _geom_angle_publ_flag 
C1 Pt1 N1 81.44(11) . . ? 
C1 Pt1 N3 174.65(10) . . ? 
N1 Pt1 N3 93.43(9) . . ? 
C1 Pt1 S2 96.52(8) . . ? 
N1 Pt1 S2 175.08(6) . . ? 
N3 Pt1 S2 88.46(6) . . ? 
C1 Pt1 Cl1 86.94(8) . . ? 
N1 Pt1 Cl1 88.94(6) . . ? 
N3 Pt1 Cl1 91.44(6) . . ? 
S2 Pt1 Cl1 86.47(2) . . ? 
C1 Pt1 Pt2 95.90(8) . . ? 
N1 Pt1 Pt2 97.38(6) . . ? 
N3 Pt1 Pt2 86.25(6) . . ? 
S2 Pt1 Pt2 87.275(17) . . ? 
Cl1 Pt1 Pt2 173.389(18) . . ? 
C14 Pt2 N2 81.68(11) . . ? 
C14 Pt2 N5 175.52(10) . . ? 
N2 Pt2 N5 93.87(9) . . ? 
C14 Pt2 S1 96.35(9) . . ? 
N2 Pt2 S1 176.23(6) . . ? 
N5 Pt2 S1 88.13(7) . . ? 
C14 Pt2 Cl2 89.04(8) . . ? 
N2 Pt2 Cl2 88.51(6) . . ? 
N5 Pt2 Cl2 91.36(6) . . ? 
S1 Pt2 Cl2 88.25(2) . . ? 
C14 Pt2 Pt1 93.61(8) . . ? 
N2 Pt2 Pt1 95.65(6) . . ? 
N5 Pt2 Pt1 86.30(6) . . ? 
S1 Pt2 Pt1 87.666(17) . . ? 
Cl2 Pt2 Pt1 175.352(18) . . ? 
C27 S1 Pt2 105.63(10) . . ? 
C32 S2 Pt1 105.23(10) . . ? 
C11 N1 C12 118.6(2) . . ? 
C11 N1 Pt1 128.7(2) . . ? 
C12 N1 Pt1 112.62(18) . . ? 
C24 N2 C25 119.3(3) . . ? 
C24 N2 Pt2 127.8(2) . . ? 
C25 N2 Pt2 112.90(19) . . ? 
C28 N3 C27 117.7(3) . . ? 
C28 N3 Pt1 120.15(19) . . ? 
C27 N3 Pt1 121.63(19) . . ? 
C30 N4 C27 116.9(2) . . ? 
C33 N5 C32 117.6(2) . . ? 
C33 N5 Pt2 120.45(18) . . ? 
C32 N5 Pt2 121.81(18) . . ? 
C35 N6 C32 116.4(2) . . ? 
C2 C1 C13 118.2(3) . . ? 
C2 C1 Pt1 129.9(2) . . ? 
C13 C1 Pt1 111.9(2) . . ? 
C1 C2 C3 119.7(3) . . ? 
C4 C3 C2 122.3(3) . . ? 
C3 C4 C5 119.4(3) . . ? 
C13 C5 C4 117.7(3) . . ? 
C13 C5 C6 118.8(3) . . ? 
C4 C5 C6 123.5(3) . . ? 
C7 C6 C5 121.4(3) . . ? 
C6 C7 C8 121.4(3) . . ? 
C9 C8 C12 118.0(3) . . ? 
C9 C8 C7 124.8(3) . . ? 
C12 C8 C7 117.3(3) . . ? 
C10 C9 C8 119.2(3) . . ? 
C9 C10 C11 119.9(3) . . ? 
N1 C11 C10 122.1(3) . . ? 
N1 C12 C8 122.2(3) . . ? 
N1 C12 C13 115.7(2) . . ? 
C8 C12 C13 122.1(3) . . ? 
C5 C13 C1 122.6(3) . . ? 
C5 C13 C12 119.0(3) . . ? 
C1 C13 C12 118.3(3) . . ? 
C15 C14 C26 117.8(3) . . ? 
C15 C14 Pt2 130.5(2) . . ? 
C26 C14 Pt2 111.7(2) . . ? 
C14 C15 C16 119.9(3) . . ? 
C17 C16 C15 122.3(3) . . ? 
C16 C17 C18 119.7(3) . . ? 
C17 C18 C26 117.6(3) . . ? 
C17 C18 C19 124.1(3) . . ? 
C26 C18 C19 118.2(3) . . ? 
C20 C19 C18 121.8(3) . . ? 
C19 C20 C21 121.2(3) . . ? 
C25 C21 C22 117.6(3) . . ? 
C25 C21 C20 117.5(3) . . ? 
C22 C21 C20 124.9(3) . . ? 
C23 C22 C21 119.3(3) . . ? 
C22 C23 C24 120.0(3) . . ? 
N2 C24 C23 121.4(3) . . ? 
N2 C25 C21 122.3(3) . . ? 
N2 C25 C26 115.8(3) . . ? 
C21 C25 C26 121.9(3) . . ? 
C18 C26 C14 122.7(3) . . ? 
C18 C26 C25 119.4(3) . . ? 
C14 C26 C25 117.9(3) . . ? 
N4 C27 N3 123.2(3) . . ? 
N4 C27 S1 116.3(2) . . ? 
N3 C27 S1 120.5(2) . . ? 
N3 C28 C29 121.8(3) . . ? 
C28 C29 C30 115.7(3) . . ? 
N4 C30 C29 124.2(3) . . ? 
N4 C30 C31 115.2(3) . . ? 
C29 C30 C31 120.6(3) . . ? 
F1 C31 F2 107.1(3) . . ? 
F1 C31 F3 107.0(3) . . ? 
F2 C31 F3 107.6(3) . . ? 
F1 C31 C30 111.6(2) . . ? 
F2 C31 C30 112.2(3) . . ? 
F3 C31 C30 111.0(3) . . ? 
N6 C32 N5 123.7(2) . . ? 
N6 C32 S2 115.9(2) . . ? 
N5 C32 S2 120.4(2) . . ? 
N5 C33 C34 121.8(3) . . ? 
C33 C34 C35 116.0(3) . . ? 
N6 C35 C34 124.0(3) . . ? 
N6 C35 C36 115.0(2) . . ? 
C34 C35 C36 120.9(3) . . ? 
F5 C36 F6 107.8(3) . . ? 
F5 C36 F4 106.3(3) . . ? 
F6 C36 F4 106.4(3) . . ? 
F5 C36 C35 112.7(3) . . ? 
F6 C36 C35 111.1(2) . . ? 
F4 C36 C35 112.2(3) . . ? 
Cl4 C37 Cl3 111.7(2) . . ? 
  
_diffrn_measured_fraction_theta_max    0.912 
_diffrn_reflns_theta_full              25.00 
_diffrn_measured_fraction_theta_full   0.995 
_refine_diff_density_max    1.131 
_refine_diff_density_min   -1.043 
_refine_diff_density_rms    0.125 
  

#===END


  
data_3 
  
_audit_creation_method            SHELXL-97 
_chemical_name_systematic 
; 
 ? 
; 
_chemical_name_common             ? 
_chemical_melting_point           ? 
_chemical_formula_moiety          ? 
_chemical_formula_sum 
 'C37 H22 Br2 Cl2 F6 N6 Pt2 S2' 
_chemical_formula_weight          1349.63 
  
loop_ 
 _atom_type_symbol 
 _atom_type_description 
 _atom_type_scat_dispersion_real 
 _atom_type_scat_dispersion_imag 
 _atom_type_scat_source 
 'C'  'C'   0.0033   0.0016 
 'International Tables Vol C Tables 4.2.6.8 and 6.1.1.4' 
 'H'  'H'   0.0000   0.0000 
 'International Tables Vol C Tables 4.2.6.8 and 6.1.1.4' 
 'N'  'N'   0.0061   0.0033 
 'International Tables Vol C Tables 4.2.6.8 and 6.1.1.4' 
 'F'  'F'   0.0171   0.0103 
 'International Tables Vol C Tables 4.2.6.8 and 6.1.1.4' 
 'S'  'S'   0.1246   0.1234 
 'International Tables Vol C Tables 4.2.6.8 and 6.1.1.4' 
 'Br'  'Br'  -0.2901   2.4595 
 'International Tables Vol C Tables 4.2.6.8 and 6.1.1.4' 
 'Pt'  'Pt'  -1.7033   8.3905 
 'International Tables Vol C Tables 4.2.6.8 and 6.1.1.4' 
 'Cl'  'Cl'   0.1484   0.1585 
 'International Tables Vol C Tables 4.2.6.8 and 6.1.1.4' 
  
_symmetry_cell_setting            triclinic 
_symmetry_space_group_name_H-M    'P -1' 
  
loop_ 
 _symmetry_equiv_pos_as_xyz 
 'x, y, z' 
 '-x, -y, -z' 
  
_cell_length_a                    11.4798(2) 
_cell_length_b                    11.8668(2) 
_cell_length_c                    14.4711(3) 
_cell_angle_alpha                 88.942(2) 
_cell_angle_beta                  81.111(2) 
_cell_angle_gamma                 78.410(2) 
_cell_volume                      1907.83(6) 
_cell_formula_units_Z             2 
_cell_measurement_temperature     100(2) 
_cell_measurement_reflns_used     19466 
_cell_measurement_theta_min       4.1781 
_cell_measurement_theta_max       28.8119 
  
_exptl_crystal_description        prismatic 
_exptl_crystal_colour             'dark red'
_exptl_crystal_size_max           0.40 
_exptl_crystal_size_mid           0.23 
_exptl_crystal_size_min           0.12 
_exptl_crystal_density_meas       ? 
_exptl_crystal_density_diffrn     2.349 
_exptl_crystal_density_method     'not measured' 
_exptl_crystal_F_000              1264 
_exptl_absorpt_coefficient_mu     9.737 
_exptl_absorpt_correction_type    multi-scan 
_exptl_absorpt_correction_T_min   0.1120 
_exptl_absorpt_correction_T_max   0.3878 
_exptl_absorpt_process_details
;
CrysAlisPro, Agilent Technologies,
Version 1.171.35.21 (release 20-01-2012 CrysAlis171 .NET)
(compiled Jan 23 2012,18:06:46)
Empirical absorption correction using spherical harmonics,
 implemented in SCALE3 ABSPACK scaling algorithm.
;
  
_diffrn_ambient_temperature       100(2) 
_diffrn_radiation_wavelength      0.71073 
_diffrn_radiation_type            MoK\a 
_diffrn_radiation_source          'fine-focus sealed tube' 
_diffrn_radiation_monochromator   graphite 
_diffrn_measurement_device_type   'Xcalibur, Sapphire3' 
_diffrn_measurement_method        '\w scans' 
_diffrn_detector_area_resol_mean  16.0655 
_diffrn_standards_number          ? 
_diffrn_standards_interval_count  ? 
_diffrn_standards_interval_time   ? 
_diffrn_standards_decay_%         ? 
_diffrn_reflns_number             41763 
_diffrn_reflns_av_R_equivalents   0.0318 
_diffrn_reflns_av_sigmaI/netI     0.0266 
_diffrn_reflns_limit_h_min        -15 
_diffrn_reflns_limit_h_max        15 
_diffrn_reflns_limit_k_min        -16 
_diffrn_reflns_limit_k_max        15 
_diffrn_reflns_limit_l_min        -19 
_diffrn_reflns_limit_l_max        19 
_diffrn_reflns_theta_min          4.19 
_diffrn_reflns_theta_max          28.88 
_diffrn_orient_matrix_UB_11       0.0331589000
_diffrn_orient_matrix_UB_12      -0.0172752000
_diffrn_orient_matrix_UB_13       0.0371119000
_diffrn_orient_matrix_UB_21       0.0345459000
_diffrn_orient_matrix_UB_22      -0.0476110000
_diffrn_orient_matrix_UB_23      -0.0273752000
_diffrn_orient_matrix_UB_31       0.0422119000
_diffrn_orient_matrix_UB_32       0.0340342000
_diffrn_orient_matrix_UB_33      -0.0183018000
_diffrn_measurement_details
;
#__ type_ start__ end____ width___ exp.time_
  1 omega  -80.00   37.00   1.0000   10.0000
omega____ theta____ kappa____ phi______ frames
    -      -19.9615  -19.0000  150.0000 117

#__ type_ start__ end____ width___ exp.time_
  2 omega  -24.00    5.00   1.0000   10.0000
omega____ theta____ kappa____ phi______ frames
    -      -19.9615  -99.0000 -120.0000 29

#__ type_ start__ end____ width___ exp.time_
  3 omega  -19.00   20.00   1.0000   10.0000
omega____ theta____ kappa____ phi______ frames
    -      -19.9615  -99.0000  150.0000 39

#__ type_ start__ end____ width___ exp.time_
  4 omega  -63.00  -37.00   1.0000   10.0000
omega____ theta____ kappa____ phi______ frames
    -      -19.9615 -179.0000  -60.0000 26

#__ type_ start__ end____ width___ exp.time_
  5 omega  -25.00   64.00   1.0000   10.0000
omega____ theta____ kappa____ phi______ frames
    -       22.1490  -99.0000    0.0000 89

#__ type_ start__ end____ width___ exp.time_
  6 omega   -8.00   95.00   1.0000   10.0000
omega____ theta____ kappa____ phi______ frames
    -       22.1490   77.0000  120.0000 103

#__ type_ start__ end____ width___ exp.time_
  7 omega  -52.00   54.00   1.0000   10.0000
omega____ theta____ kappa____ phi______ frames
    -      -19.9615   37.0000 -150.0000 106

#__ type_ start__ end____ width___ exp.time_
  8 omega  -44.00   51.00   1.0000   10.0000
omega____ theta____ kappa____ phi______ frames
    -      -19.9615   57.0000  -90.0000 95

#__ type_ start__ end____ width___ exp.time_
  9 omega -100.00  -34.00   1.0000   10.0000
omega____ theta____ kappa____ phi______ frames
    -      -19.9615 -179.0000  -30.0000 66

#__ type_ start__ end____ width___ exp.time_
 10 omega  -30.00   21.00   1.0000   10.0000
omega____ theta____ kappa____ phi______ frames
    -      -19.9615  -94.0000  -19.0000 51

#__ type_ start__ end____ width___ exp.time_
 11 omega   -2.00   93.00   1.0000   10.0000
omega____ theta____ kappa____ phi______ frames
    -       22.1490   57.0000  -30.0000 95

#__ type_ start__ end____ width___ exp.time_
 12 omega  -44.00   51.00   1.0000   10.0000
omega____ theta____ kappa____ phi______ frames
    -      -19.9615   57.0000    0.0000 95

#__ type_ start__ end____ width___ exp.time_
 13 omega  -25.00   67.00   1.0000   10.0000
omega____ theta____ kappa____ phi______ frames
    -       22.1490  -99.0000  150.0000 92

#__ type_ start__ end____ width___ exp.time_
 14 omega  -19.00   30.00   1.0000   10.0000
omega____ theta____ kappa____ phi______ frames
    -       22.1490   94.0000 -160.0000 49

#__ type_ start__ end____ width___ exp.time_
 15 omega   -2.00   23.00   1.0000   10.0000
omega____ theta____ kappa____ phi______ frames
    -       22.1490   57.0000   60.0000 25

#__ type_ start__ end____ width___ exp.time_
 16 omega   -2.00   93.00   1.0000   10.0000
omega____ theta____ kappa____ phi______ frames
    -       22.1490   57.0000  120.0000 95

;
_reflns_number_total              9166 
_reflns_number_gt                 8243 
_reflns_threshold_expression      >2sigma(I) 
  
_computing_data_collection
;
CrysAlisPro, Agilent Technologies,
Version 1.171.35.21 (release 20-01-2012 CrysAlis171 .NET)
(compiled Jan 23 2012,18:06:46)
;
_computing_cell_refinement
;
CrysAlisPro, Agilent Technologies,
Version 1.171.35.21 (release 20-01-2012 CrysAlis171 .NET)
(compiled Jan 23 2012,18:06:46)
;
_computing_data_reduction
;
CrysAlisPro, Agilent Technologies,
Version 1.171.35.21 (release 20-01-2012 CrysAlis171 .NET)
(compiled Jan 23 2012,18:06:46)
;
_computing_structure_solution     'SHELXS-97 (Sheldrick, 1990)' 
_computing_structure_refinement   'SHELXL-97 (Sheldrick, 1997)' 
_computing_molecular_graphics     ? 
_computing_publication_material   ? 
  
_refine_special_details 
; 
 Refinement of F^2^ against ALL reflections.  The weighted R-factor wR and 
 goodness of fit S are based on F^2^, conventional R-factors R are based 
 on F, with F set to zero for negative F^2^. The threshold expression of 
 F^2^ > 2sigma(F^2^) is used only for calculating R-factors(gt) etc. and is 
 not relevant to the choice of reflections for refinement.  R-factors based 
 on F^2^ are statistically about twice as large as those based on F, and R- 
 factors based on ALL data will be even larger. 
; 
  
_refine_ls_structure_factor_coef  Fsqd 
_refine_ls_matrix_type            full 
_refine_ls_weighting_scheme       calc 
_refine_ls_weighting_details 
 'calc w=1/[\s^2^(Fo^2^)+(0.0239P)^2^+1.7455P] where P=(Fo^2^+2Fc^2^)/3' 
_atom_sites_solution_primary      direct 
_atom_sites_solution_secondary    difmap 
_atom_sites_solution_hydrogens    geom 
_refine_ls_hydrogen_treatment     constr
_refine_ls_extinction_method      none 
_refine_ls_extinction_coef        ? 
_refine_ls_number_reflns          9166 
_refine_ls_number_parameters      514 
_refine_ls_number_restraints      12 
_refine_ls_R_factor_all           0.0277 
_refine_ls_R_factor_gt            0.0232 
_refine_ls_wR_factor_ref          0.0534 
_refine_ls_wR_factor_gt           0.0516 
_refine_ls_goodness_of_fit_ref    1.058 
_refine_ls_restrained_S_all       1.109 
_refine_ls_shift/su_max           0.002 
_refine_ls_shift/su_mean          0.000 
  
loop_ 
 _atom_site_label 
 _atom_site_type_symbol 
 _atom_site_fract_x 
 _atom_site_fract_y 
 _atom_site_fract_z 
 _atom_site_U_iso_or_equiv 
 _atom_site_adp_type 
 _atom_site_occupancy 
 _atom_site_symmetry_multiplicity 
 _atom_site_calc_flag 
 _atom_site_refinement_flags 
 _atom_site_disorder_assembly 
 _atom_site_disorder_group 
Pt1 Pt 0.283540(10) 0.625323(10) 0.747912(8) 0.00901(4) Uani 1 1 d . . . 
Pt2 Pt 0.113938(10) 0.523625(10) 0.709792(8) 0.00881(4) Uani 1 1 d . . . 
Br1 Br 0.44763(3) 0.73605(3) 0.76874(2) 0.01542(7) Uani 1 1 d . . . 
Br2 Br -0.06441(3) 0.43658(3) 0.67923(2) 0.01458(7) Uani 1 1 d . . . 
S1 S -0.01517(7) 0.63642(7) 0.82552(5) 0.01207(16) Uani 1 1 d . . . 
S2 S 0.30598(7) 0.68200(7) 0.59446(5) 0.01334(16) Uani 1 1 d . . . 
N1 N 0.2781(2) 0.5760(2) 0.88778(17) 0.0107(5) Uani 1 1 d . . . 
N2 N 0.2239(2) 0.4134(2) 0.60744(18) 0.0119(5) Uani 1 1 d . . . 
N3 N 0.1427(2) 0.7765(2) 0.78082(17) 0.0109(5) Uani 1 1 d . . . 
N4 N -0.0502(2) 0.8563(2) 0.86291(18) 0.0123(5) Uani 1 1 d . . . 
N5 N 0.0742(2) 0.6614(2) 0.61319(18) 0.0112(5) Uani 1 1 d . . . 
N6 N 0.1465(2) 0.7803(2) 0.49247(18) 0.0130(6) Uani 1 1 d . . . 
F1 F -0.1572(2) 1.0267(2) 0.99202(15) 0.0373(6) Uani 1 1 d . . . 
F2 F -0.0650(2) 1.1473(2) 0.9160(2) 0.0450(7) Uani 1 1 d U . . 
F3 F -0.20317(19) 1.0873(2) 0.86050(16) 0.0330(6) Uani 1 1 d . . . 
F4 F 0.0491(3) 0.9859(2) 0.40183(16) 0.0463(7) Uani 1 1 d . . . 
F5 F -0.0919(2) 0.9067(3) 0.3733(2) 0.0648(9) Uani 1 1 d U . . 
F6 F 0.0886(2) 0.84161(19) 0.31175(14) 0.0332(6) Uani 1 1 d . . . 
C1 C 0.4160(3) 0.4843(3) 0.7299(2) 0.0113(6) Uani 1 1 d . . . 
C2 C 0.4903(3) 0.4374(3) 0.6495(2) 0.0161(7) Uani 1 1 d . . . 
H2 H 0.4800 0.4714 0.5906 0.019 Uiso 1 1 calc R . . 
C3 C 0.5808(3) 0.3396(3) 0.6552(2) 0.0194(7) Uani 1 1 d . . . 
H3 H 0.6312 0.3086 0.5994 0.023 Uiso 1 1 calc R . . 
C4 C 0.5990(3) 0.2871(3) 0.7384(2) 0.0202(8) Uani 1 1 d . . . 
H4 H 0.6605 0.2206 0.7397 0.024 Uiso 1 1 calc R . . 
C5 C 0.5260(3) 0.3324(3) 0.8224(2) 0.0146(7) Uani 1 1 d . . . 
C6 C 0.5395(3) 0.2846(3) 0.9125(2) 0.0174(7) Uani 1 1 d . . . 
H6 H 0.5987 0.2170 0.9172 0.021 Uiso 1 1 calc R . . 
C7 C 0.4697(3) 0.3336(3) 0.9912(2) 0.0168(7) Uani 1 1 d . . . 
H7 H 0.4820 0.3005 1.0500 0.020 Uiso 1 1 calc R . . 
C8 C 0.3781(3) 0.4339(3) 0.9879(2) 0.0129(6) Uani 1 1 d . . . 
C9 C 0.3009(3) 0.4885(3) 1.0657(2) 0.0157(7) Uani 1 1 d . . . 
H9 H 0.3071 0.4591 1.1266 0.019 Uiso 1 1 calc R . . 
C10 C 0.2159(3) 0.5851(3) 1.0533(2) 0.0156(7) Uani 1 1 d . . . 
H10 H 0.1633 0.6230 1.1056 0.019 Uiso 1 1 calc R . . 
C11 C 0.2073(3) 0.6268(3) 0.9634(2) 0.0131(6) Uani 1 1 d . . . 
H11 H 0.1488 0.6939 0.9558 0.016 Uiso 1 1 calc R . . 
C12 C 0.3635(3) 0.4805(3) 0.8992(2) 0.0107(6) Uani 1 1 d . . . 
C13 C 0.4371(3) 0.4311(3) 0.8158(2) 0.0120(6) Uani 1 1 d . . . 
C14 C 0.1613(3) 0.3878(3) 0.7913(2) 0.0112(6) Uani 1 1 d . . . 
C15 C 0.1289(3) 0.3727(3) 0.8858(2) 0.0144(7) Uani 1 1 d . . . 
H15 H 0.0739 0.4319 0.9222 0.017 Uiso 1 1 calc R . . 
C16 C 0.1768(3) 0.2702(3) 0.9284(2) 0.0177(7) Uani 1 1 d . . . 
H16 H 0.1540 0.2616 0.9937 0.021 Uiso 1 1 calc R . . 
C17 C 0.2557(3) 0.1819(3) 0.8784(2) 0.0184(7) Uani 1 1 d . . . 
H17 H 0.2881 0.1141 0.9092 0.022 Uiso 1 1 calc R . . 
C18 C 0.2884(3) 0.1924(3) 0.7814(2) 0.0155(7) Uani 1 1 d . . . 
C19 C 0.3687(3) 0.1032(3) 0.7224(3) 0.0207(8) Uani 1 1 d . . . 
H19 H 0.4016 0.0328 0.7495 0.025 Uiso 1 1 calc R . . 
C20 C 0.3977(3) 0.1182(3) 0.6295(2) 0.0198(7) Uani 1 1 d . . . 
H20 H 0.4504 0.0580 0.5927 0.024 Uiso 1 1 calc R . . 
C21 C 0.3507(3) 0.2230(3) 0.5852(2) 0.0171(7) Uani 1 1 d . . . 
C22 C 0.3795(3) 0.2476(3) 0.4901(2) 0.0191(7) Uani 1 1 d . . . 
H22 H 0.4347 0.1928 0.4496 0.023 Uiso 1 1 calc R . . 
C23 C 0.3276(3) 0.3515(3) 0.4559(2) 0.0174(7) Uani 1 1 d . . . 
H23 H 0.3455 0.3678 0.3914 0.021 Uiso 1 1 calc R . . 
C24 C 0.2488(3) 0.4326(3) 0.5161(2) 0.0148(7) Uani 1 1 d . . . 
H24 H 0.2120 0.5033 0.4915 0.018 Uiso 1 1 calc R . . 
C25 C 0.2722(3) 0.3099(3) 0.6417(2) 0.0125(6) Uani 1 1 d . . . 
C26 C 0.2403(3) 0.2955(3) 0.7395(2) 0.0126(6) Uani 1 1 d . . . 
C27 C 0.0304(3) 0.7671(3) 0.8217(2) 0.0112(6) Uani 1 1 d . . . 
C28 C 0.1689(3) 0.8814(3) 0.7721(2) 0.0148(7) Uani 1 1 d . . . 
H28 H 0.2448 0.8897 0.7389 0.018 Uiso 1 1 calc R . . 
C29 C 0.0891(3) 0.9773(3) 0.8099(2) 0.0153(7) Uani 1 1 d . . . 
H29 H 0.1069 1.0521 0.8035 0.018 Uiso 1 1 calc R . . 
C30 C -0.0189(3) 0.9580(3) 0.8578(2) 0.0136(7) Uani 1 1 d . . . 
C31 C -0.1118(3) 1.0553(3) 0.9071(2) 0.0188(7) Uani 1 1 d . . . 
C32 C 0.1625(3) 0.7101(3) 0.5649(2) 0.0121(6) Uani 1 1 d . . . 
C33 C -0.0383(3) 0.6958(3) 0.5929(2) 0.0141(7) Uani 1 1 d . . . 
H33 H -0.1025 0.6668 0.6283 0.017 Uiso 1 1 calc R . . 
C34 C -0.0625(3) 0.7717(3) 0.5223(2) 0.0149(7) Uani 1 1 d . . . 
H34 H -0.1419 0.7979 0.5090 0.018 Uiso 1 1 calc R . . 
C35 C 0.0355(3) 0.8077(3) 0.4718(2) 0.0147(7) Uani 1 1 d . . . 
C36 C 0.0211(3) 0.8854(3) 0.3890(2) 0.0209(8) Uani 1 1 d . . . 
Cl1 Cl 0.43030(10) 0.04788(10) 0.10385(7) 0.0351(2) Uani 1 1 d . . . 
Cl2 Cl 0.29278(12) 0.08354(13) 0.29070(9) 0.0572(4) Uani 1 1 d . . . 
C37 C 0.3213(4) 0.1420(4) 0.1788(3) 0.0367(11) Uani 1 1 d . . . 
H37A H 0.2457 0.1594 0.1516 0.044 Uiso 1 1 calc R . . 
H37B H 0.3489 0.2151 0.1844 0.044 Uiso 1 1 calc R . . 
  
loop_ 
 _atom_site_aniso_label 
 _atom_site_aniso_U_11 
 _atom_site_aniso_U_22 
 _atom_site_aniso_U_33 
 _atom_site_aniso_U_23 
 _atom_site_aniso_U_13 
 _atom_site_aniso_U_12 
Pt1 0.00891(6) 0.01014(7) 0.00817(6) 0.00102(5) -0.00228(4) -0.00167(5) 
Pt2 0.00956(6) 0.00866(7) 0.00833(6) 0.00068(4) -0.00191(4) -0.00174(5) 
Br1 0.01413(16) 0.01902(18) 0.01587(16) 0.00171(13) -0.00590(12) -0.00727(13) 
Br2 0.01478(16) 0.01415(17) 0.01676(16) 0.00005(13) -0.00442(12) -0.00594(13) 
S1 0.0128(4) 0.0098(4) 0.0130(4) -0.0008(3) -0.0002(3) -0.0021(3) 
S2 0.0120(4) 0.0184(4) 0.0104(4) 0.0036(3) -0.0030(3) -0.0042(3) 
N1 0.0119(13) 0.0119(14) 0.0088(12) 0.0022(10) -0.0027(10) -0.0028(11) 
N2 0.0106(13) 0.0132(15) 0.0120(13) -0.0005(11) -0.0014(10) -0.0031(11) 
N3 0.0108(13) 0.0106(14) 0.0100(12) -0.0004(10) -0.0031(10) 0.0017(11) 
N4 0.0126(13) 0.0120(14) 0.0121(13) -0.0004(11) -0.0049(10) 0.0007(11) 
N5 0.0119(13) 0.0106(14) 0.0113(12) 0.0005(10) -0.0029(10) -0.0019(11) 
N6 0.0142(13) 0.0124(15) 0.0112(13) 0.0016(11) -0.0006(10) -0.0006(11) 
F1 0.0553(16) 0.0270(14) 0.0176(11) 0.0005(9) 0.0052(11) 0.0118(12) 
F2 0.0344(13) 0.0244(13) 0.0740(17) -0.0233(12) 0.0042(12) -0.0083(11) 
F3 0.0232(12) 0.0374(15) 0.0308(12) -0.0029(11) -0.0085(10) 0.0155(10) 
F4 0.098(2) 0.0148(13) 0.0252(12) 0.0064(10) -0.0072(14) -0.0125(14) 
F5 0.0297(13) 0.096(2) 0.0666(17) 0.0637(16) -0.0160(12) -0.0079(14) 
F6 0.0594(16) 0.0210(12) 0.0145(10) 0.0032(9) -0.0020(10) 0.0000(11) 
C1 0.0101(15) 0.0106(16) 0.0136(15) 0.0000(12) -0.0034(12) -0.0018(12) 
C2 0.0157(16) 0.0214(19) 0.0109(15) 0.0002(13) -0.0017(13) -0.0032(14) 
C3 0.0158(17) 0.022(2) 0.0172(17) -0.0042(14) -0.0006(13) 0.0024(15) 
C4 0.0152(17) 0.020(2) 0.0219(18) -0.0012(15) -0.0041(14) 0.0050(14) 
C5 0.0186(17) 0.0113(17) 0.0147(16) 0.0003(13) -0.0065(13) -0.0018(14) 
C6 0.0185(17) 0.0125(18) 0.0217(17) 0.0030(14) -0.0079(14) -0.0013(14) 
C7 0.0192(17) 0.0165(18) 0.0168(16) 0.0041(13) -0.0084(13) -0.0042(14) 
C8 0.0144(15) 0.0131(17) 0.0132(15) 0.0032(12) -0.0055(12) -0.0056(13) 
C9 0.0207(17) 0.0180(19) 0.0110(15) 0.0039(13) -0.0050(13) -0.0083(14) 
C10 0.0187(17) 0.0191(19) 0.0090(15) -0.0007(13) -0.0007(13) -0.0051(14) 
C11 0.0137(15) 0.0121(17) 0.0130(15) -0.0011(12) -0.0028(12) -0.0006(13) 
C12 0.0106(15) 0.0100(16) 0.0122(15) 0.0019(12) -0.0041(12) -0.0020(12) 
C13 0.0098(15) 0.0129(17) 0.0131(15) 0.0028(12) -0.0029(12) -0.0012(13) 
C14 0.0115(15) 0.0087(16) 0.0145(15) 0.0039(12) -0.0054(12) -0.0021(12) 
C15 0.0162(16) 0.0144(18) 0.0132(15) 0.0021(13) -0.0035(13) -0.0037(14) 
C16 0.0220(18) 0.0182(19) 0.0161(16) 0.0046(14) -0.0058(14) -0.0099(15) 
C17 0.0224(18) 0.0127(18) 0.0229(18) 0.0076(14) -0.0096(14) -0.0063(15) 
C18 0.0137(16) 0.0118(17) 0.0217(17) 0.0026(13) -0.0069(13) -0.0008(13) 
C19 0.0189(18) 0.0107(18) 0.032(2) 0.0008(15) -0.0083(15) 0.0016(14) 
C20 0.0161(17) 0.0142(18) 0.0262(19) -0.0058(14) -0.0014(14) 0.0027(14) 
C21 0.0147(16) 0.0170(19) 0.0199(17) -0.0050(14) -0.0028(13) -0.0032(14) 
C22 0.0141(16) 0.021(2) 0.0207(17) -0.0065(14) 0.0009(14) -0.0023(14) 
C23 0.0172(17) 0.022(2) 0.0136(16) -0.0041(14) 0.0000(13) -0.0062(15) 
C24 0.0156(16) 0.0158(18) 0.0134(15) -0.0022(13) -0.0006(12) -0.0053(14) 
C25 0.0135(15) 0.0072(16) 0.0168(16) -0.0025(12) -0.0030(13) -0.0015(13) 
C26 0.0145(16) 0.0115(17) 0.0140(15) 0.0015(12) -0.0056(12) -0.0057(13) 
C27 0.0115(15) 0.0132(17) 0.0096(14) 0.0019(12) -0.0052(12) -0.0014(13) 
C28 0.0164(16) 0.0154(18) 0.0145(16) 0.0053(13) -0.0050(13) -0.0059(14) 
C29 0.0192(17) 0.0121(17) 0.0169(16) 0.0034(13) -0.0084(13) -0.0047(14) 
C30 0.0170(16) 0.0112(17) 0.0135(15) -0.0003(13) -0.0083(13) -0.0008(13) 
C31 0.0180(17) 0.0162(19) 0.0224(18) 0.0003(14) -0.0050(14) -0.0030(14) 
C32 0.0133(15) 0.0113(17) 0.0117(15) -0.0027(12) -0.0010(12) -0.0027(13) 
C33 0.0113(15) 0.0161(18) 0.0153(16) -0.0031(13) -0.0027(12) -0.0026(13) 
C34 0.0143(16) 0.0131(17) 0.0169(16) 0.0007(13) -0.0041(13) -0.0008(13) 
C35 0.0193(17) 0.0119(17) 0.0124(15) -0.0005(13) -0.0040(13) -0.0008(14) 
C36 0.0165(17) 0.027(2) 0.0189(17) 0.0078(15) -0.0048(14) -0.0020(15) 
Cl1 0.0362(6) 0.0352(6) 0.0344(5) -0.0016(4) -0.0058(4) -0.0081(5) 
Cl2 0.0560(8) 0.0709(10) 0.0438(7) -0.0225(6) 0.0122(6) -0.0241(7) 
C37 0.022(2) 0.026(2) 0.064(3) -0.008(2) -0.008(2) -0.0069(18) 
  
_geom_special_details 
; 
 All esds (except the esd in the dihedral angle between two l.s. planes) 
 are estimated using the full covariance matrix.  The cell esds are taken 
 into account individually in the estimation of esds in distances, angles 
 and torsion angles; correlations between esds in cell parameters are only 
 used when they are defined by crystal symmetry.  An approximate (isotropic) 
 treatment of cell esds is used for estimating esds involving l.s. planes. 
; 
  
loop_ 
 _geom_bond_atom_site_label_1 
 _geom_bond_atom_site_label_2 
 _geom_bond_distance 
 _geom_bond_site_symmetry_2 
 _geom_bond_publ_flag 
Pt1 C1 2.013(3) . ? 
Pt1 N1 2.092(2) . ? 
Pt1 N3 2.165(3) . ? 
Pt1 S2 2.2995(8) . ? 
Pt1 Br1 2.5593(3) . ? 
Pt1 Pt2 2.61767(16) . ? 
Pt2 C14 2.015(3) . ? 
Pt2 N2 2.080(3) . ? 
Pt2 N5 2.156(3) . ? 
Pt2 S1 2.3047(8) . ? 
Pt2 Br2 2.5692(3) . ? 
S1 C27 1.730(3) . ? 
S2 C32 1.732(3) . ? 
N1 C11 1.332(4) . ? 
N1 C12 1.367(4) . ? 
N2 C24 1.334(4) . ? 
N2 C25 1.360(4) . ? 
N3 C28 1.337(4) . ? 
N3 C27 1.358(4) . ? 
N4 C30 1.324(4) . ? 
N4 C27 1.339(4) . ? 
N5 C33 1.350(4) . ? 
N5 C32 1.361(4) . ? 
N6 C35 1.329(4) . ? 
N6 C32 1.338(4) . ? 
F1 C31 1.325(4) . ? 
F2 C31 1.325(4) . ? 
F3 C31 1.322(4) . ? 
F4 C36 1.319(4) . ? 
F5 C36 1.326(4) . ? 
F6 C36 1.309(4) . ? 
C1 C2 1.385(4) . ? 
C1 C13 1.416(4) . ? 
C2 C3 1.405(5) . ? 
C3 C4 1.371(5) . ? 
C4 C5 1.412(5) . ? 
C5 C13 1.403(5) . ? 
C5 C6 1.431(4) . ? 
C6 C7 1.354(5) . ? 
C7 C8 1.427(5) . ? 
C8 C9 1.401(4) . ? 
C8 C12 1.408(4) . ? 
C9 C10 1.377(5) . ? 
C10 C11 1.393(4) . ? 
C12 C13 1.423(4) . ? 
C14 C15 1.378(4) . ? 
C14 C26 1.416(4) . ? 
C15 C16 1.404(5) . ? 
C16 C17 1.372(5) . ? 
C17 C18 1.405(5) . ? 
C18 C26 1.405(5) . ? 
C18 C19 1.448(5) . ? 
C19 C20 1.352(5) . ? 
C20 C21 1.434(5) . ? 
C21 C22 1.403(5) . ? 
C21 C25 1.406(4) . ? 
C22 C23 1.376(5) . ? 
C23 C24 1.393(5) . ? 
C25 C26 1.422(4) . ? 
C28 C29 1.371(5) . ? 
C29 C30 1.384(4) . ? 
C30 C31 1.510(5) . ? 
C33 C34 1.372(5) . ? 
C34 C35 1.382(4) . ? 
C35 C36 1.508(5) . ? 
Cl1 C37 1.747(4) . ? 
Cl2 C37 1.760(5) . ? 
  
loop_ 
 _geom_angle_atom_site_label_1 
 _geom_angle_atom_site_label_2 
 _geom_angle_atom_site_label_3 
 _geom_angle 
 _geom_angle_site_symmetry_1 
 _geom_angle_site_symmetry_3 
 _geom_angle_publ_flag 
C1 Pt1 N1 81.55(11) . . ? 
C1 Pt1 N3 174.71(11) . . ? 
N1 Pt1 N3 93.37(10) . . ? 
C1 Pt1 S2 96.25(9) . . ? 
N1 Pt1 S2 175.06(7) . . ? 
N3 Pt1 S2 88.70(7) . . ? 
C1 Pt1 Br1 86.29(9) . . ? 
N1 Pt1 Br1 88.73(7) . . ? 
N3 Pt1 Br1 92.14(7) . . ? 
S2 Pt1 Br1 86.71(2) . . ? 
C1 Pt1 Pt2 95.87(9) . . ? 
N1 Pt1 Pt2 97.23(7) . . ? 
N3 Pt1 Pt2 86.20(7) . . ? 
S2 Pt1 Pt2 87.38(2) . . ? 
Br1 Pt1 Pt2 173.901(9) . . ? 
C14 Pt2 N2 81.56(12) . . ? 
C14 Pt2 N5 175.20(11) . . ? 
N2 Pt2 N5 93.69(10) . . ? 
C14 Pt2 S1 96.31(9) . . ? 
N2 Pt2 S1 176.21(7) . . ? 
N5 Pt2 S1 88.48(7) . . ? 
C14 Pt2 Br2 88.22(9) . . ? 
N2 Pt2 Br2 88.71(7) . . ? 
N5 Pt2 Br2 92.34(7) . . ? 
S1 Pt2 Br2 88.09(2) . . ? 
C14 Pt2 Pt1 93.52(9) . . ? 
N2 Pt2 Pt1 95.57(7) . . ? 
N5 Pt2 Pt1 86.27(7) . . ? 
S1 Pt2 Pt1 87.66(2) . . ? 
Br2 Pt2 Pt1 175.567(9) . . ? 
C27 S1 Pt2 105.72(11) . . ? 
C32 S2 Pt1 105.65(11) . . ? 
C11 N1 C12 118.6(3) . . ? 
C11 N1 Pt1 128.8(2) . . ? 
C12 N1 Pt1 112.5(2) . . ? 
C24 N2 C25 119.1(3) . . ? 
C24 N2 Pt2 127.9(2) . . ? 
C25 N2 Pt2 113.0(2) . . ? 
C28 N3 C27 118.4(3) . . ? 
C28 N3 Pt1 120.1(2) . . ? 
C27 N3 Pt1 121.0(2) . . ? 
C30 N4 C27 117.2(3) . . ? 
C33 N5 C32 117.5(3) . . ? 
C33 N5 Pt2 120.7(2) . . ? 
C32 N5 Pt2 121.5(2) . . ? 
C35 N6 C32 116.6(3) . . ? 
C2 C1 C13 117.4(3) . . ? 
C2 C1 Pt1 130.3(2) . . ? 
C13 C1 Pt1 112.1(2) . . ? 
C1 C2 C3 119.9(3) . . ? 
C4 C3 C2 122.3(3) . . ? 
C3 C4 C5 119.8(3) . . ? 
C13 C5 C4 117.3(3) . . ? 
C13 C5 C6 119.0(3) . . ? 
C4 C5 C6 123.7(3) . . ? 
C7 C6 C5 121.4(3) . . ? 
C6 C7 C8 121.6(3) . . ? 
C9 C8 C12 117.7(3) . . ? 
C9 C8 C7 125.0(3) . . ? 
C12 C8 C7 117.2(3) . . ? 
C10 C9 C8 119.5(3) . . ? 
C9 C10 C11 119.6(3) . . ? 
N1 C11 C10 122.5(3) . . ? 
N1 C12 C8 122.1(3) . . ? 
N1 C12 C13 115.8(3) . . ? 
C8 C12 C13 122.0(3) . . ? 
C5 C13 C1 123.3(3) . . ? 
C5 C13 C12 118.8(3) . . ? 
C1 C13 C12 117.9(3) . . ? 
C15 C14 C26 117.7(3) . . ? 
C15 C14 Pt2 130.5(3) . . ? 
C26 C14 Pt2 111.8(2) . . ? 
C14 C15 C16 120.3(3) . . ? 
C17 C16 C15 121.9(3) . . ? 
C16 C17 C18 119.7(3) . . ? 
C26 C18 C17 118.0(3) . . ? 
C26 C18 C19 118.2(3) . . ? 
C17 C18 C19 123.8(3) . . ? 
C20 C19 C18 121.3(3) . . ? 
C19 C20 C21 121.6(3) . . ? 
C22 C21 C25 117.0(3) . . ? 
C22 C21 C20 125.4(3) . . ? 
C25 C21 C20 117.6(3) . . ? 
C23 C22 C21 119.7(3) . . ? 
C22 C23 C24 119.9(3) . . ? 
N2 C24 C23 121.6(3) . . ? 
N2 C25 C21 122.6(3) . . ? 
N2 C25 C26 115.7(3) . . ? 
C21 C25 C26 121.6(3) . . ? 
C18 C26 C14 122.5(3) . . ? 
C18 C26 C25 119.7(3) . . ? 
C14 C26 C25 117.9(3) . . ? 
N4 C27 N3 122.6(3) . . ? 
N4 C27 S1 116.1(2) . . ? 
N3 C27 S1 121.2(2) . . ? 
N3 C28 C29 121.7(3) . . ? 
C28 C29 C30 115.7(3) . . ? 
N4 C30 C29 123.9(3) . . ? 
N4 C30 C31 115.1(3) . . ? 
C29 C30 C31 121.0(3) . . ? 
F3 C31 F2 107.1(3) . . ? 
F3 C31 F1 107.0(3) . . ? 
F2 C31 F1 107.5(3) . . ? 
F3 C31 C30 111.7(3) . . ? 
F2 C31 C30 111.3(3) . . ? 
F1 C31 C30 112.1(3) . . ? 
N6 C32 N5 123.7(3) . . ? 
N6 C32 S2 115.7(2) . . ? 
N5 C32 S2 120.6(2) . . ? 
N5 C33 C34 121.7(3) . . ? 
C33 C34 C35 116.0(3) . . ? 
N6 C35 C34 124.0(3) . . ? 
N6 C35 C36 115.2(3) . . ? 
C34 C35 C36 120.8(3) . . ? 
F6 C36 F4 106.3(3) . . ? 
F6 C36 F5 107.2(3) . . ? 
F4 C36 F5 106.8(3) . . ? 
F6 C36 C35 113.0(3) . . ? 
F4 C36 C35 112.4(3) . . ? 
F5 C36 C35 110.7(3) . . ? 
Cl1 C37 Cl2 111.9(3) . . ? 
  
_diffrn_measured_fraction_theta_max    0.915 
_diffrn_reflns_theta_full              25.00 
_diffrn_measured_fraction_theta_full   0.995 
_refine_diff_density_max    1.252 
_refine_diff_density_min   -1.942 
_refine_diff_density_rms    0.142 
  
